# Supplementary material
Source: publisher site journal article supplement (https://www.dovepress.com/article/566570)
Supplement: Supplementary file 1 [file 566570%20Supplementary%20file.docx]

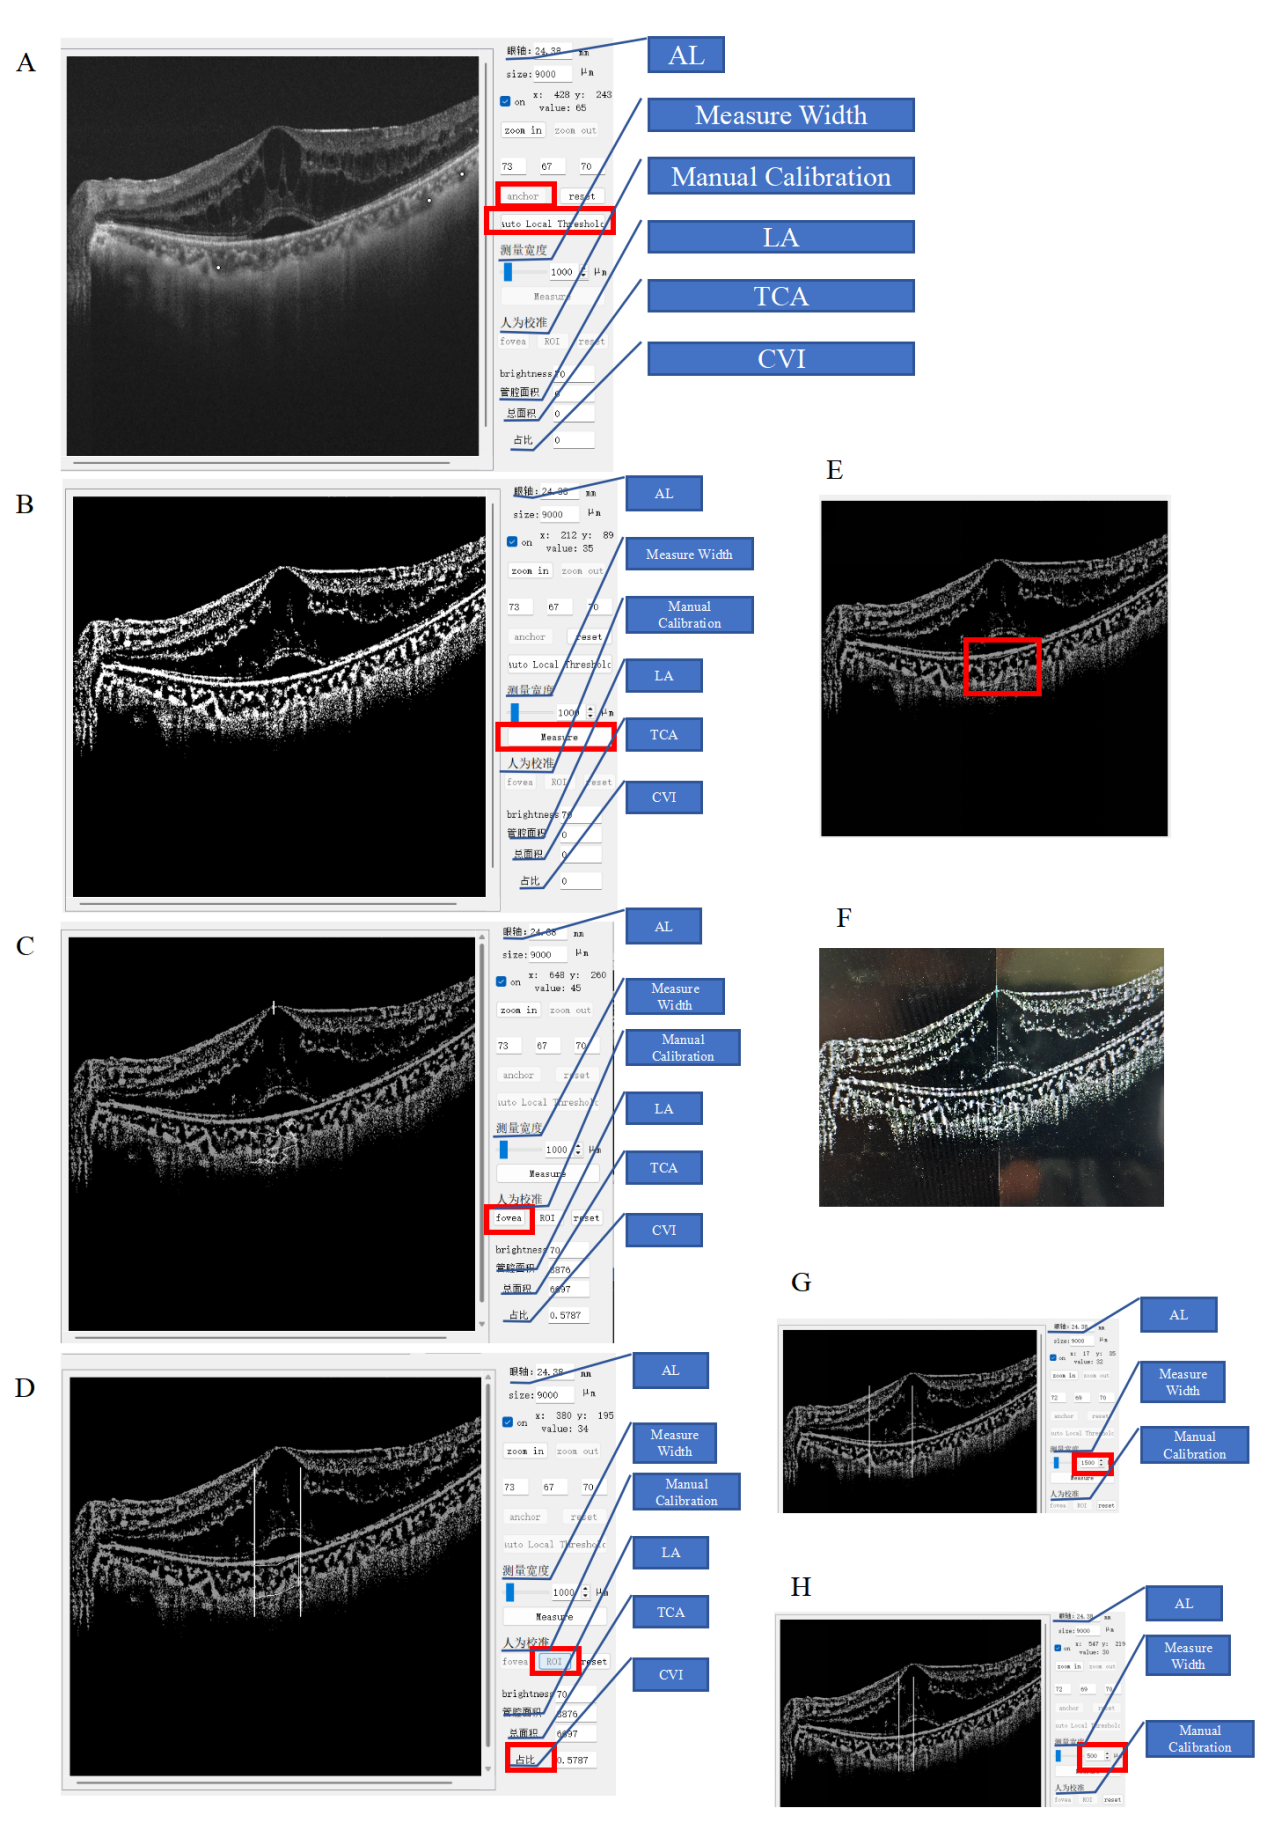


Supplementary Figure 1. Schematic Diagram of Choroidal Vascularity Index Measurement Using Semi-Automated Software

A: Original SS-OCT image. The workflow begins by selecting the “Anchor” button to identify major choroidal vessel lumens, followed by clicking “Auto Local Threshold” to generate the binarized image. Chinese translations for these interface elements are annotated in blue panels.

B: The binarized image is shown. The “Measure” button is clicked after setting the measurement width to activate the subsequent analysis buttons.

C: The newly activated steps involve clicking “Fovea” to define the anatomic center, and then “ROI” to activate the measurement boundaries.

D: Manual refinement of the choroidal region within the active ROI.

E: Final CVI measurement output for the central subfield.

(F–H) Workflow for measuring CVI in inner ETDRS quadrants using a transparent alignment guide.

F: A transparent overlay is positioned such that its physical edge serves as a vertical reference line, which is aligned with the foveal center. This ensures consistent and reproducible positioning for quadrant-specific measurements.

(G–H) With the foveal center aligned to the reference edge, the digital ROI boundary is positioned to cover the desired inner quadrant. Adjusting the ROI width (e.g., to 1500 µm or 500 µm) enables the calculation of quadrant-specific CVI using the formula:

quadrant-specific CVI = (LA1500 µm – LA500 µm) / (TCA1500 µm – TCA500 µm), where LA and TCA denote the luminal and total choroidal areas, respectively.

CVI was derived using an established semi-automated algorithm48. Binarization was performed according to published methods46 49 50, followed by customized computational segmentation50. The software automatically standardized the physical ROI width across different OCT scan sizes (6 mm, 9 mm, or 12 mm) to ensure consistent measurement areas. Throughout panels (A) to (H), red rectangles indicate the sequential key steps in the software operation workflow.

AL: axis length; CVI: choroidal vascularity index; ETDRS: Early Treatment Diabetic Retinopathy Study; LA: lumina larea; ROI: region of interest; SS-OCT: swept-source optical coherence tomography; TCA: total choroidal area.


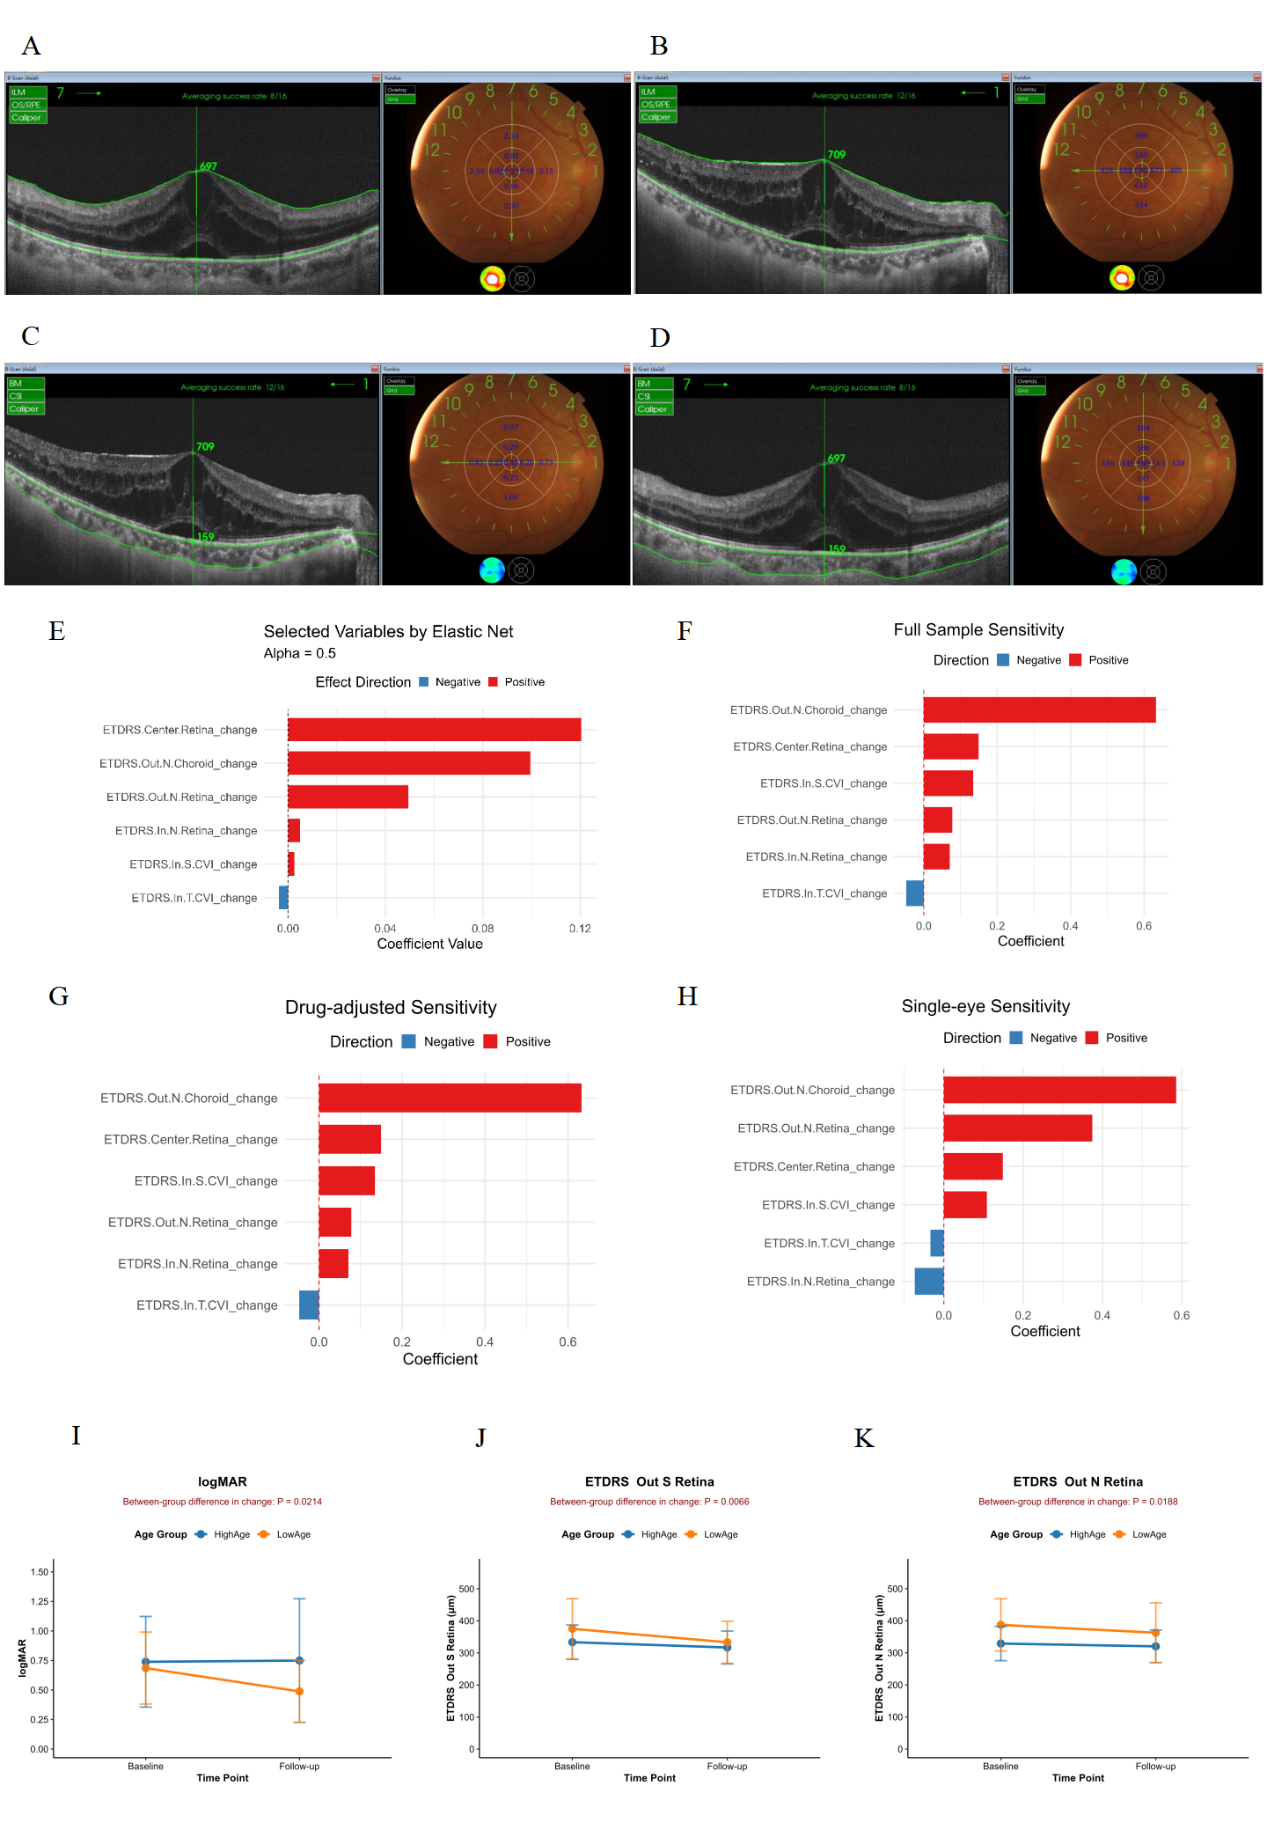


Supplementary Figure 2. Retinal and Choroidal Topographic Mapping and Predictive Model Sensitivity Analysis

(A-D) Schematic diagrams of the ETDRS grid applied to SS-OCT volumetric and thickness data. Panels illustrate the topographic distribution of (A) retinal volume, (B) retinal mean thickness, (C) choroidal volume, and (D) choroidal mean thickness across the macular region. All quantitative data for these parameters, including total retinal and choroidal volumes within the ETDRS subfields, were exported directly from the proprietary Topcon software for analysis.

(E) Coefficient magnitude plot from the post-hoc linear regression models using Elastic-Net selected variables, illustrating the direction and relative importance of each predictor. Red and blue bars distinguish positive and negative associations with visual acuity improvement, respectively.

(F-H) Sensitivity analyses using post-hoc linear regression models fitted with the Elastic-Net selected predictors under different analytical conditions, transitioning from eye-level to subject-level data. (F) Analysis of all available eyes at subject level. (G) Analysis of models adjusted for anti-VEGF drug type. (H) Analysis restricted to one eye per participant (the eye showing the greatest visual acuity improvement) to control for interocular correlation.

(I-K) Line plots (corresponding to Figure 3B-D) displaying measurements at baseline and follow-up for variables with significant intergroup differences, with error bars representing the standard deviation (SD).

Standard Early Treatment Diabetic Retinopathy Study (ETDRS) grid was used with central subfield (r = 0.5 mm) (Central), inner ring (r = 0.5-1.5 mm) (In) and outer ring (r = 1.5-3 mm) (Out). Inner ring and outer ring were divided into four parts: superior part (S), inferior part (I), nasal part (N) and temporal part (T). In.S. stood for superior part of inner ring and so were the others47.

BM: Bruch’s membrane; CSI: choroidal-scleral interface; CVI: choroidal vascularity index; ETDRS: Early Treatment Diabetic Retinopathy Study; ILM: inner limiting membrane; RPE: retinal pigment epithelial; SD: standard deviation; SS-OCT: swept-source optical coherence tomography.
